# Supplementary material for: The Effect of Low-Dose Naltrexone on Medication in Inflammatory Bowel Disease: A Quasi Experimental Before-and-After Prescription Database Study
Source: PubMed Central journal article supplement — J Crohns Colitis. 2018 Jan 27;12(6):677–86. doi: 10.1093/ecco-jcc/jjy008 (PMC5972567; doi:10.1093/ecco-jcc/jjy008), 2018-01-27
Supplement: jjy008_suppl_supplementary_data_1.pdf [file jjy008_suppl_supplementary_data_1.pdf]

## Supplementary data 1

### Inclusion criteria

Patients with inflammatory bowel disease that used low dose naltrexone (LDN) were identified from the Norwegian Prescription Database (NorPD). At least one of criterium 2 **OR** criterium 3 had to be fulfilled for both 2009 and 2010.

**1.** ≥1 prescription on low dose naltrexone (product identification number 361181) in 2013

**AND**

**(2.** NorPD records with any of the following reimbursement codes in 2009 **OR** 2010:

- a. ICD-10 K50 (Crohn's disease)
- b. ICD-10 K51.\* (Ulcerative colitis)
- c. ICPC-2 D94 (Chronic enteritis/ulcerative colitis)

**OR**

**3.** NorPD records with any of the following Anatomical Therapeutic Chemical (ATC) codes in 2009 **OR** 2010:

- a. A07EA (Intestinal corticosteroids)
- b. A07EC02 (Mesalazine)
- c. A07EC03 (Olsalazin)
- d. A07EC04 (Balsalazid)
- c. L04A A33 (Vedolizumab))
