# Supplementary material for: The Effect of Low-Dose Naltrexone on Medication in Inflammatory Bowel Disease: A Quasi Experimental Before-and-After Prescription Database Study
Source: PubMed Central journal article supplement — J Crohns Colitis. 2018 Jan 27;12(6):677–86. doi: 10.1093/ecco-jcc/jjy008 (PMC5972567; doi:10.1093/ecco-jcc/jjy008), 2018-01-27
Supplement: jjy008_suppl_supplementary_data_2.pdf [file jjy008_suppl_supplementary_data_2.pdf]

**Supplementary data 2.** Average cumulative dispensing of agents used in the treatment of inflammatory bowel disease in disease modifying medication in defined daily dose (DDD) in Norwegian patients with Crohn's disease two years before and after first dispense of low dose naltrexone (LDN). Three groups based on number of LDN dispenses: LDN x 1 (N=54) collected LDN once, LDN x 2-3 (N=35) two or three times and LDN x 4+ (N=50) four or more times. Other immunosuppressants include azathioprine, mercaptopurine, methotrexate and tacrolimus.

| Crohn's disease                           | Group     | Average DDD per patient |           | Difference of mean |                 | p     |
|-------------------------------------------|-----------|-------------------------|-----------|--------------------|-----------------|-------|
|                                           |           | Before LDN              | After LDN | DDD                | (95% CI)        |       |
| <b>All outcome drugs</b>                  | LDN x1    | 665.1                   | 742.1     | 77.1               | -113.0 to 267.1 | 0.420 |
|                                           | LDN x 2-3 | 624.7                   | 673.7     | 49.0               | -84.7 to 182.7  | 0.461 |
|                                           | LDN x 4+  | 838.6                   | 730.0     | -108.6             | -309.4 to 92.2  | 0.282 |
| <b>Systemic immunosuppressants</b>        | LDN x1    | 371.8                   | 380.8     | 9.0                | -117.5 to 135.5 | 0.887 |
|                                           | LDN x 2-3 | 323.9                   | 363.4     | 39.5               | -72.1 to 151.1  | 0.477 |
|                                           | LDN x 4+  | 435.6                   | 401.7     | -33.9              | -141.9 to 74.2  | 0.531 |
| Systemic glucocorticoids                  | LDN x1    | 138.3                   | 106.7     | -31.6              | -85.1 to 21.1   | 0.242 |
|                                           | LDN x 2-3 | 148.6                   | 179.0     | 30.3               | -56.9 to 117.6  | 0.485 |
|                                           | LDN x 4+  | 200.0                   | 200.3     | 0.3                | -94.3 to 94.9   | 0.995 |
| TNF- $\alpha$ inhibitors                  | LDN x1    | 132.3                   | 159.5     | 27.2               | -66.4 to 120.8  | 0.563 |
|                                           | LDN x 2-3 | 93.8                    | 121.4     | 27.6               | -74.3 to 129.5  | 0.586 |
|                                           | LDN x 4+  | 107.0                   | 75.6      | -31.4              | -94.7 to 31.8   | 0.323 |
| Other immunosuppressants                  | LDN x1    | 101.2                   | 114.5     | 13.4               | -38.2 to 64.9   | 0.606 |
|                                           | LDN x 2-3 | 81.4                    | 63.0      | -18.4              | -61.4 to 24.6   | 0.391 |
|                                           | LDN x 4+  | 128.6                   | 125.8     | -2.7               | -48.0 to 42.6   | 0.905 |
| <b>Intestinal antiinflammatory agents</b> | LDN x1    | 293.3                   | 361.3     | 68.1               | -42.3 to 178.5  | 0.221 |
|                                           | LDN x 2-3 | 300.8                   | 310.3     | 9.5                | -64.7 to 83.7   | 0.796 |
|                                           | LDN x 4+  | 403.0                   | 328.3     | -74.7              | -221.9 to 72.5  | 0.313 |
| Intestinal corticosteroids                | LDN x1    | 62.6                    | 61.9      | -0.7               | 35.2 to 33.7    | 0.965 |
|                                           | LDN x 2-3 | 77.4                    | 73.2      | -4.2               | -47.7 to 39.2   | 0.845 |
|                                           | LDN x 4+  | 100.8                   | 64.5      | -36.3              | -101.1 to 28.5  | 0.266 |
| Aminosalisylates                          | LDN x1    | 230.7                   | 299.5     | 68.8               | -34.7 to 172.4  | 0.188 |
|                                           | LDN x 2-3 | 223.3                   | 237.1     | 13.7               | -41.8 to 69.3   | 0.619 |
|                                           | LDN x 4+  | 302.2                   | 263.8     | -38.4              | -129.2 to 52.4  | 0.399 |
