# Supplementary material for: The Effect of Low-Dose Naltrexone on Medication in Inflammatory Bowel Disease: A Quasi Experimental Before-and-After Prescription Database Study
Source: PubMed Central journal article supplement — J Crohns Colitis. 2018 Jan 27;12(6):677–86. doi: 10.1093/ecco-jcc/jjy008 (PMC5972567; doi:10.1093/ecco-jcc/jjy008), 2018-01-27

- LDN x 1 before
- LDN x 2-3 before
- LDN x 4 before
- ⋯ LDN x 1 after
- ⋯ LDN x 2-3 after
- ⋯ LDN x 4 after

TNF A  
inhibitors

All IBD

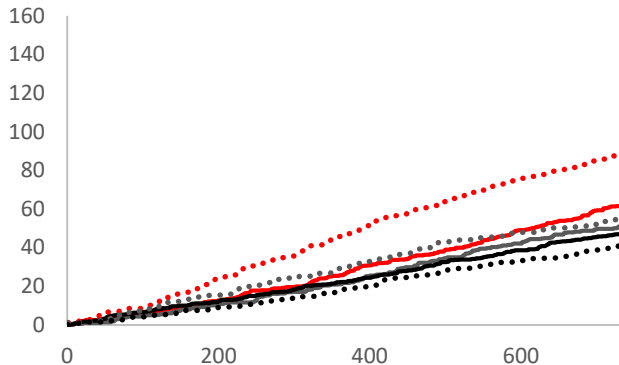

Crohn's  
disease

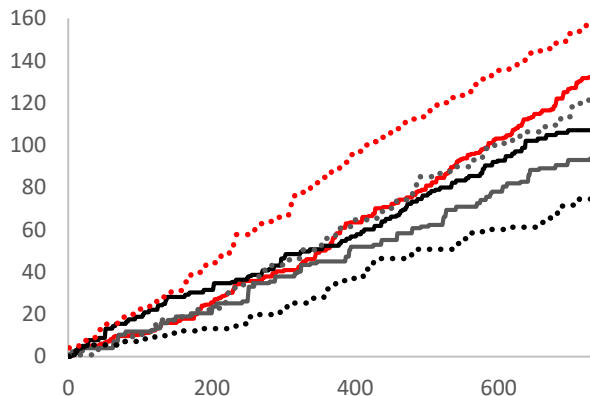

Ulcerative  
colitis

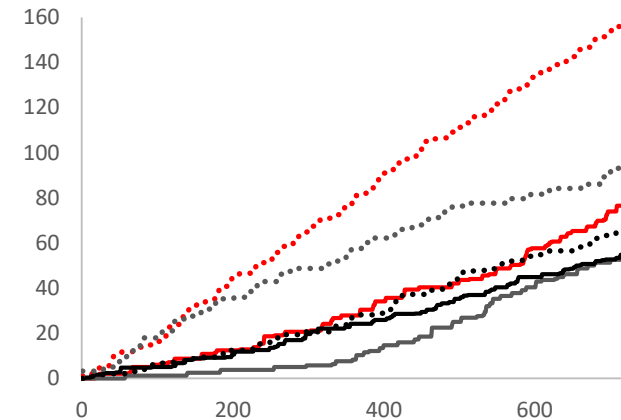

Systemic  
corticosteroids

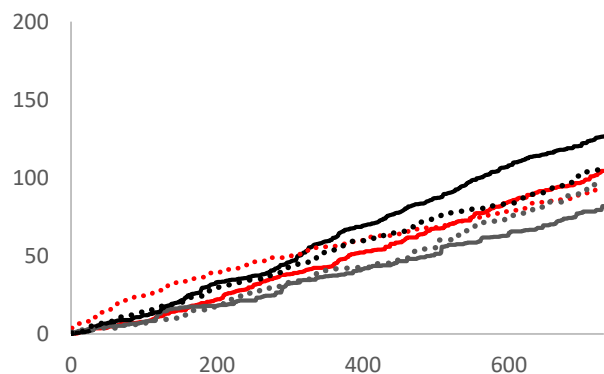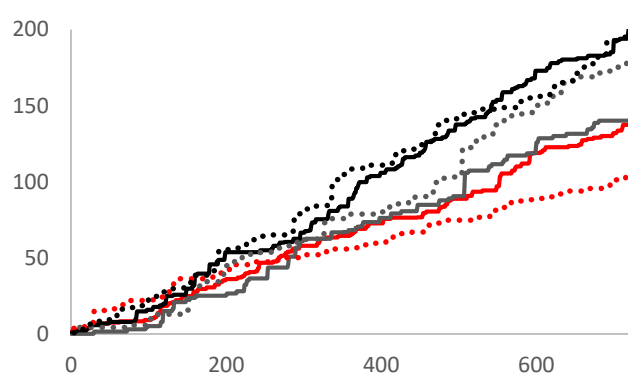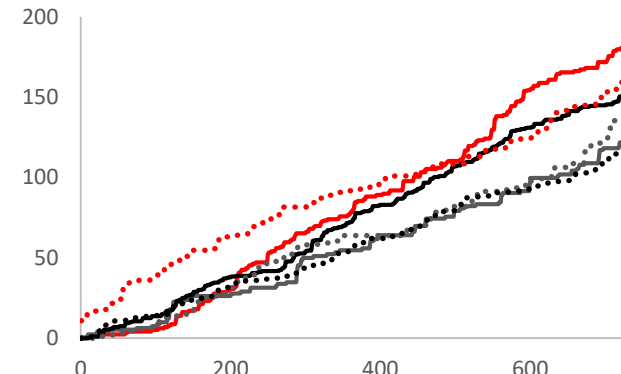

Other immuno-  
suppressants

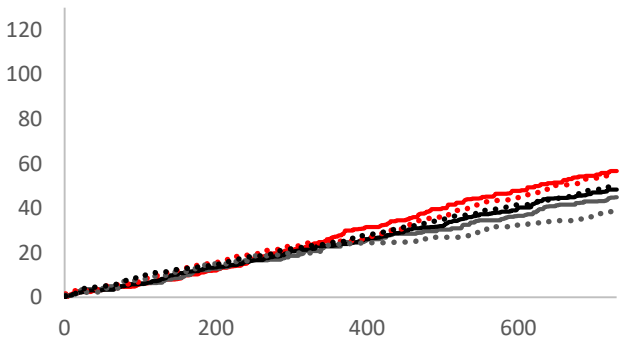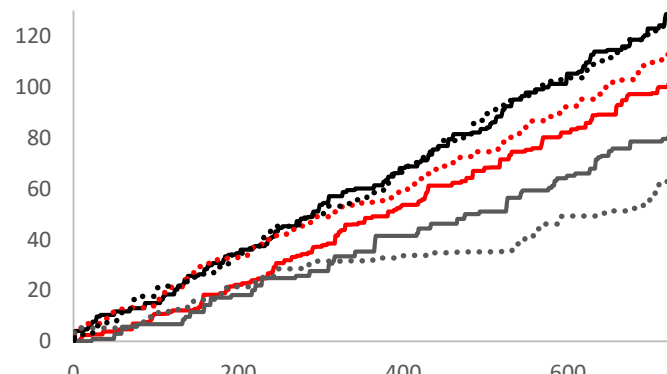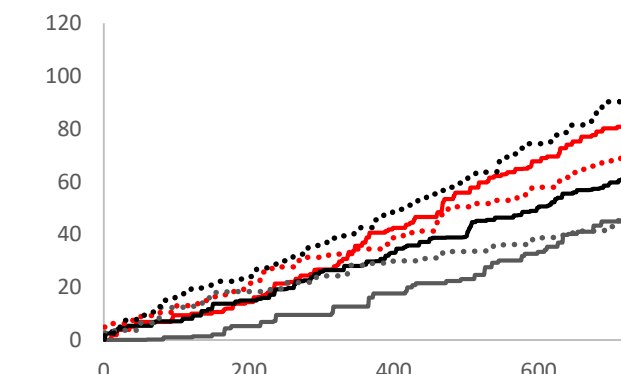

Supplement: jjy008_suppl_supplementary_data_6.pdf [file jjy008_suppl_supplementary_data_6.pdf]
