# Supplementary material for: The Effect of Low-Dose Naltrexone on Medication in Inflammatory Bowel Disease: A Quasi Experimental Before-and-After Prescription Database Study
Source: PubMed Central journal article supplement — J Crohns Colitis. 2018 Jan 27;12(6):677–86. doi: 10.1093/ecco-jcc/jjy008 (PMC5972567; doi:10.1093/ecco-jcc/jjy008), 2018-01-27

### All IBD

### Crohns disease

### Ulcerative colitis

- LDN x 1 before
- LDN x 2-3 before
- LDN x 4 before
- ..... LDN x 1 after
- ..... LDN x 2-3 after
- ..... LDN x 4 after

Amino-salicylates

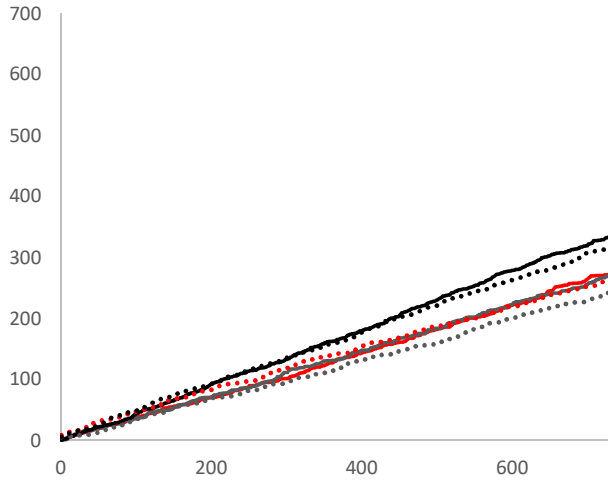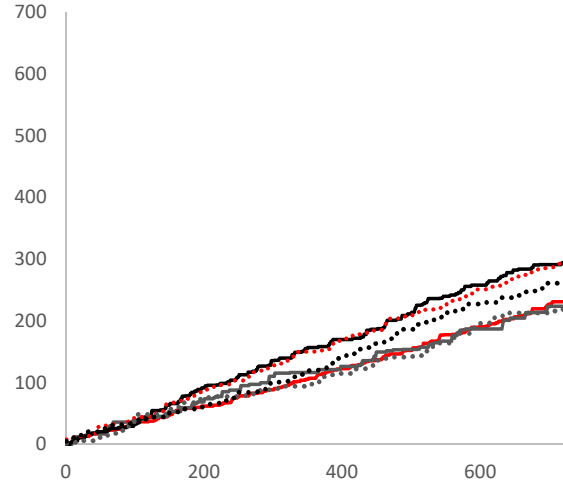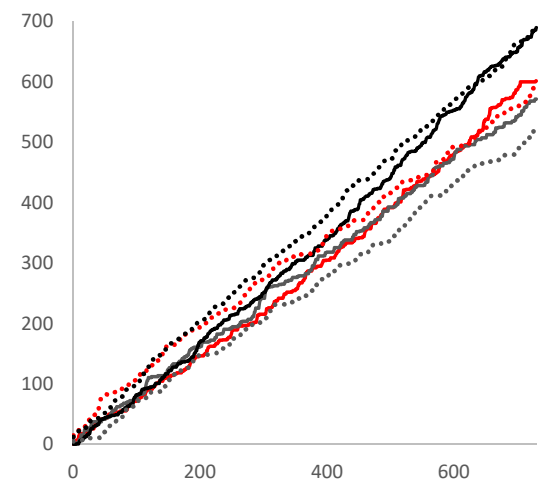

Intestinal corticosteroids

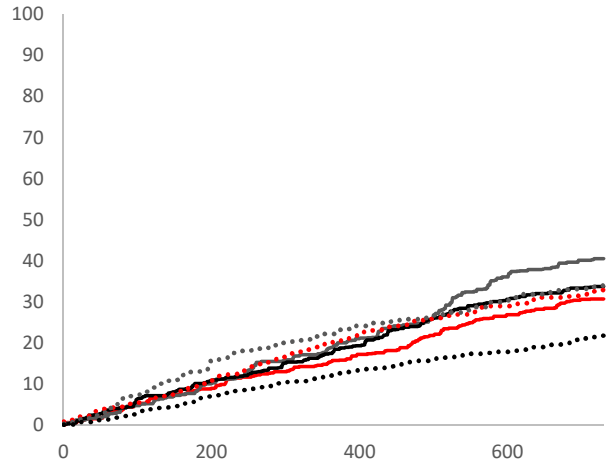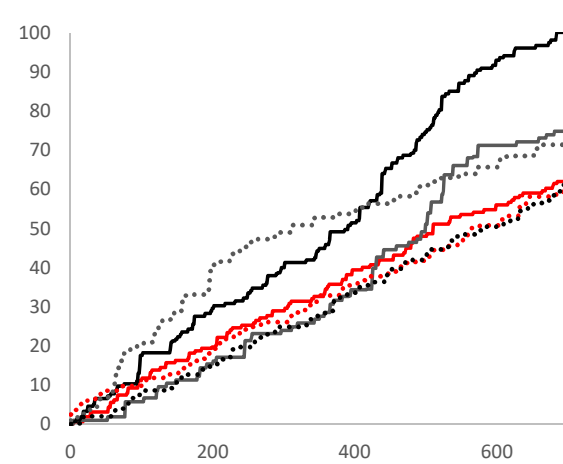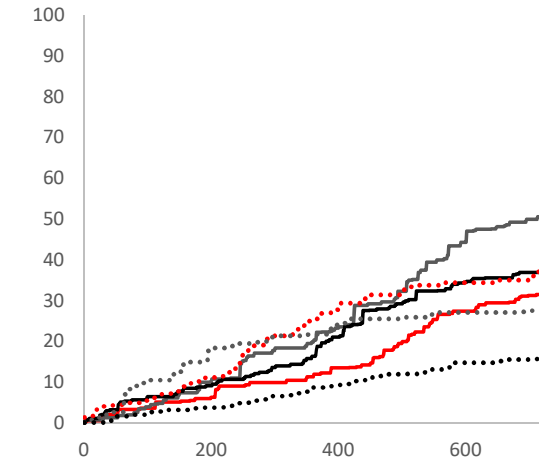

Supplement: jjy008_suppl_supplementary_data_7.pdf [file jjy008_suppl_supplementary_data_7.pdf]
